CORRECTION

# Correction: Earliest evidence for equid bit wear in the ancient Near East: The "ass" from Early Bronze Age Tell eš-Šâfi/Gath, Israel

Haskel J. Greenfield, Itzhaq Shai, Tina L. Greenfield, Elizabeth R. Arnold, Annie Brown, Adi Eliyahu-Behar, Aren M. Maeir

The sixth author's name is spelled incorrectly. The correct name is: Adi Eliyahu-Behar. The correct citation is: Greenfield HJ, Shai I, Greenfield TL, Arnold ER, Brown A, Eliyahu-Behar A, et al. (2018) Earliest evidence for equid bit wear in the ancient Near East: The "ass" from Early Bronze Age Tell eš-Šâfi/Gath, Israel. PLoS ONE 13(5): e0196335. <https://doi.org/10.1371/journal.pone.0196335>

## Reference

1. Greenfield HJ, Shai I, Greenfield TL, Arnold ER, Brown A, Eliyahu A, et al. (2018) Earliest evidence for equid bit wear in the ancient Near East: The "ass" from Early Bronze Age Tell eš-Šâfi/Gath, Israel. PLoS ONE 13(5): e0196335. <https://doi.org/10.1371/journal.pone.0196335> PMID: 29768439

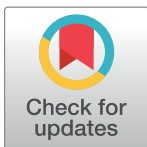

## OPEN ACCESS

**Citation:** Greenfield HJ, Shai I, Greenfield TL, Arnold ER, Brown A, Eliyahu-Behar A, et al. (2018) Correction: Earliest evidence for equid bit wear in the ancient Near East: The "ass" from Early Bronze Age Tell eš-Šâfi/Gath, Israel. PLoS ONE 13(8): e0202382. <https://doi.org/10.1371/journal.pone.0202382>

**Published:** August 9, 2018

**Copyright:** © 2018 Greenfield et al. This is an open access article distributed under the terms of the [Creative Commons Attribution License](https://creativecommons.org/licenses/by/4.0/), which permits unrestricted use, distribution, and reproduction in any medium, provided the original author and source are credited.
